# Supplementary material
Source: publisher site journal article supplement (https://www.spandidos-publications.com/2555/downloadSupplementary)
Supplement: Supplementary file 1 [file downloadSupplementary]

## Sheet: Table S1
Table SI. Gene names of the 560 genes in the exome sequencing panel.
Gene
ABCB1
ABCB11
ABCC2
ABL1
ACVR2A
ACVR1B
ADAMTS20
AKT1
AKT2
AKT3
ALK
APC
AR
ARID1A
ARID1B
ARID2
ASXL1
ATM
ATRX
AXIN1
AXIN2
B2M
BAP1
BCL2
BCOR
BLM
BMPR1A
BRAF
BRCA1
BRCA2
BRIP1
BUB1B
C2orf44
CANT1
CARD11
CASP8
CBL
CDA
CDC73
CDH1
CDK4
CDKN1B
CDKN2A
CDKN2B
CEBPA
CHEK2
CHIC2
CIC
CREBBP
CRLF2
CSF1R
CTNNB1
CUX1
CYLD
CYP19A1
CYP2A6
CYP2B6
CYP2C19
CYP2C9
CYP2D6
DAXX
DDB2
DDR1
DDR2
DDX3X
DICER1
DIS3L2
DKC1
DNMT1
DNMT3A
DOCK8
DPYD
EGFR
EML4
EP300
ERBB2
ERBB3
ERBB4
ERCC2
ERCC3
ERCC4
ERCC5
ERG
ESR1
ESR2
ETV1
ETV4
ETV5
ETV6
EWSR1
EXT1
EXT2
EZH2
EZR
FAM46C
FAM123B
FANCA
FANCC
FANCG
FBXW7
FGFR1
FGFR2
FGFR3
FGFR4
FH
FLCN
FLT1
FLT3
FLT4
FOXA1
FOXL2
FSTL5
FUBP1
GATA1
GATA2
GATA3
GNA11
GNAQ
GNAS
GPC3
GSTP1
GRIN2A
H3F3A
HFE
HIST1H3B
HNF1A
HRAS
IDH1
IDH2
IKZF1
IL2RA
IL2RB
IL2RG
INPP4B
ITK
JAK1
JAK2
JAK3
KDM5C
KDM6A
KDR
KIF5B
KIT
KLF4
KMT2A
KMT2D
KRAS
LAMA2
LCK
LRIG3
LTK
MAP2K1
MAP2K2
MAP2K4
MAP3K1
MAPK1
MAX
MED12
MED13
MEN1
MET
MLH1
MITF
MPL
MSH2
MSH6
MST1R
MTAP
MTOR
MUTYH
MYC
MYCL
MYCN
MYD88
NBN
NCOR1
NELL2
NF1
NF2
NFE2L2
NOTCH1
NOTCH2
NPM1
NRG1
NRAS
NKX2-1
NTRK1
NTRK3
PALB2
PAX5
PBX1
PBRM1
PDGFRA
PDGFRB
PHF6
PHOX2B
PIK3CA
PIK3R1
PMS1
PMS2
POLD1
POLE
POLH
PPP2R1A
PRDM1
PRKAR1A
PRF1
PRSS1
PSMB1
PSMB2
PSMB5
PSMD1
PSMD2
PTCH1
PTEN
PTPN11
PTPRK
RAC1
RAD21
RAD51C
RAD51D
RAF1
RARA
RARB
RARG
RB1
RECQL4
RET
RHBDF2
NME1
RNF43
RSPO2
RSPO3
ROS1
RPS6KB1
RUNX1
RXRA
RXRB
RXRG
SBDS
SDC4
SDHA
SDHAF2
SDHB
SDHC
SDHD
SETBP1
SETD2
SF3B1
SHH
SHOC2
SLC22A1
SLC22A2
SLC25A13
SLC31A1
SLC34A2
SLC45A3
SLCO1B1
SMAD2
SMAD4
SMARCA4
SMARCB1
SMARCD1
SMARCE1
SMO
SNCAIP
SOCS1
SOS1
SOX9
SPOP
SPRED1
SRC
SRSF2
STAG2
STAT3
STK11
SUFU
TAS2R38
TERT
TET2
TGFBR1
TMEM127
TNFAIP3
FAS
TP53
TRAF7
TRIM37
TRRAP
TSC1
TSC2
TSHR
TYK2
U2AF1
UGT1A1
UROD
VHL
WAS
WRN
WT1
XPA
XPC
YES1
ZMYM3
PTPRD
TCF7L2
ACSL3
ABL2
CHD7
FBXO7
AFF1
AFF3
AKAP9
ARNT
ATF1
ATR
AURKA
AURKB
AURKC
AXL
BAI3
BCL10
BCL11A
BCL11B
BCL2L1
BCL2L2
BCL3
BCL6
BCL9
BCR
BIRC3
BIRC2
BIRC5
BLNK
BRD3
BTK
CASC5
CCND1
CCND2
CCNE1
CD79A
CD79B
CDH11
CDH2
CDH20
CDH5
CDK12
CDK6
CDK8
CDKN2C
CHEK1
CKS1B
CMPK1
COL1A1
CUL4A
CRBN
CREB1
CRKL
CRTC1
CSMD3
CTNNA1
DCC
DDIT3
DEK
DST
EP400
GUCY2F
EPHA3
EPHA7
EPHB1
EPHB4
EPHB6
ERCC1
ETS1
FANCD2
FANCF
CCDC6
FLI1
CD74
FN1
FOXO1
FOXO3
FOXO4
FOXP1
FOXP4
FZR1
G6PD
GDNF
GPR124
GRM8
GUCY1A2
HCAR1
HIF1A
HLF
HSP90AA1
KLF6
EIF3E
HOOK3
HSP90AB1
COL7A1
ELANE
FAH
GBA
GJB2
HMBS
SERPINA1
XRCC2
USP9X
TNK2
TLR4
TIMP3
THBS1
TGFBR2
TCF7L1
SYNE1
SOX11
SMUG1
SH2D1A
SGK1
SEPT9
SAMD9
RRM1
RPS6KA2
RNF2
RNASEL
RHOH
RAD50
PTPRT
PTGS2
PRKDC
PIK3R2
PIK3CD
PIK3CG
PARP1
PAK3
NOTCH4
NLRP1
NFKB1
MYCL1
MTRR
MTR
MRE11A
MMP2
MLL3
MCL1
MBD1
IL2
IL21R
IL7R
IRF4
ITGA10
JUN
KAT6A
KAT6B
MDM4
MDM2
MARK1
MAPK8
MAML2
MALT1
MAFB
MAF
LPP
POT1
LIFR
MLLT10
MN1
MUC1
MYB
MYH11
MYH9
NCOA1
NCOA2
NCOA4
PGAP3
PER1
PDGFB
PDE4DIP
PAX8
PAX7
NUP98
PAX3
NUP214
NUMA1
NSD1
NIN
NFKB2
PIK3C2B
PIK3CB
PIM1
PKHD1
PLAG1
PLCG1
PLEKHG5
PML
POU5F1
PPARG
PSIP1
RALGDS
REL
RNF213
RUNX1T1
SOX2
STK36
SSX1
SYK
TAF1
TAF1L
TAL1
TBX22
TCF12
TCF3
TCL1A
TET1
TGM7
TFE3
TLX1
TNFRSF14
TPR
TOP1
TRIM24
TRIP11
TRIM33
UBR5
WHSC1
XPO1
ZNF384
ZNF521
IL6ST
MARK4
MAP3K7
MAGI1
MAGEA1
LTF
LRP1B
LPHN3
LAMP1
KEAP1
ITGB3
ITGB2
ITGA9
IRS2
ING4
IKBKB
IKBKE
IGF2R
IGF2
IGF1R
ABCC4
DHFR
MTHFR
CSF3R
SH2B3
SOD2
FCGR3A
TPMT
UGT1A9
C8orf34
XRCC1
CBR3
UMPS
